# Supplementary material for: Physical Gold Nanoparticle-Decorated Polyethylene Glycol-Hydroxyapatite Composites Guide Osteogenesis and Angiogenesis of Mesenchymal Stem Cells
Source: MDPI journal article supplement (doi:10.3390/biomedicines9111632), 2021-11-06
Supplement: s1 [file s1]

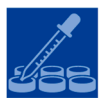

# Physical Gold Nanoparticle-Decorated Polyethylene Glycol-Hydroxyapatite Composites Guide Osteogenesis and Angiogenesis of Mesenchymal Stem Cells

## Supplementary Data

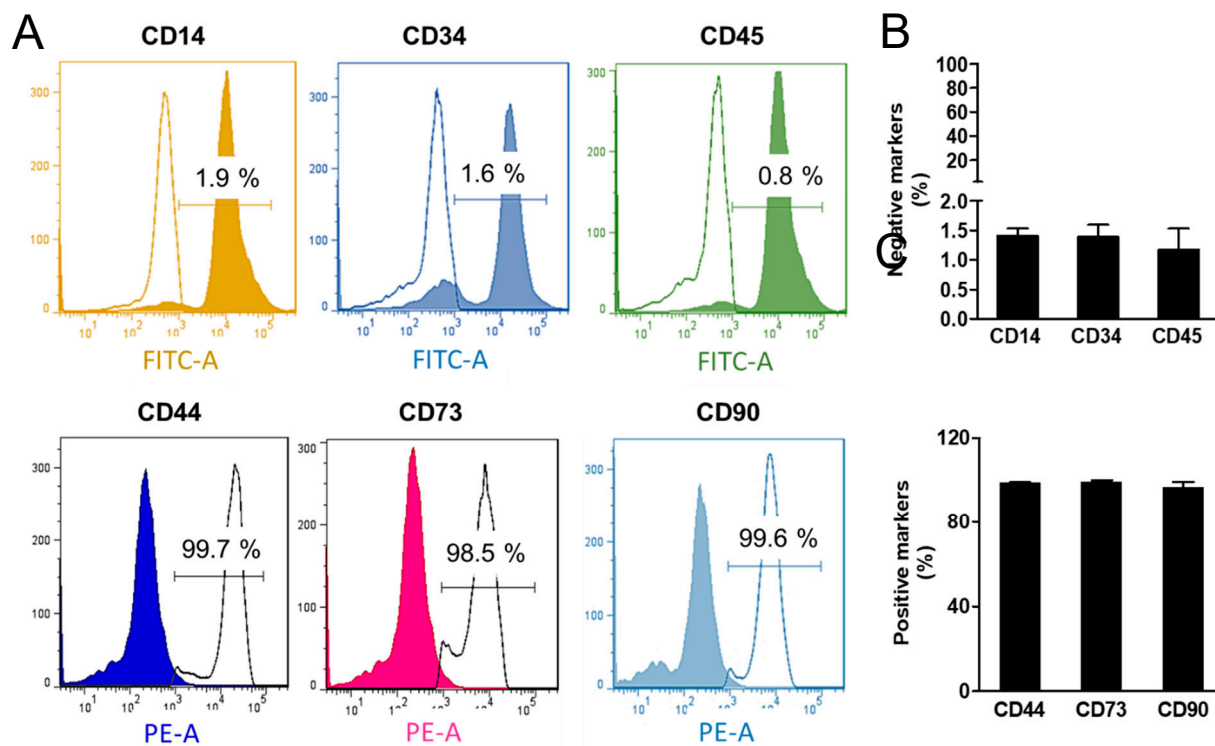

**Figure S1. Characterization of MSCs using flow cytometry analysis.** (A) Cells were harvested and incubated with the respective antibody conjugated with fluorescein isothiocyanate (FITC) and/or phycoerythrin (PE). The indicated markers: CD14-FITC, CD34-FITC, CD45-FITC, CD44-PE, CD73-PE, and CD90-PE (BD Pharmingen, USA). Filled area represents isotype controls. (B) The FACS results of negative markers: CD14, CD34, and CD45 expression. (C) The FACS data of positive markers: CD44, CD73, and CD90 expression.

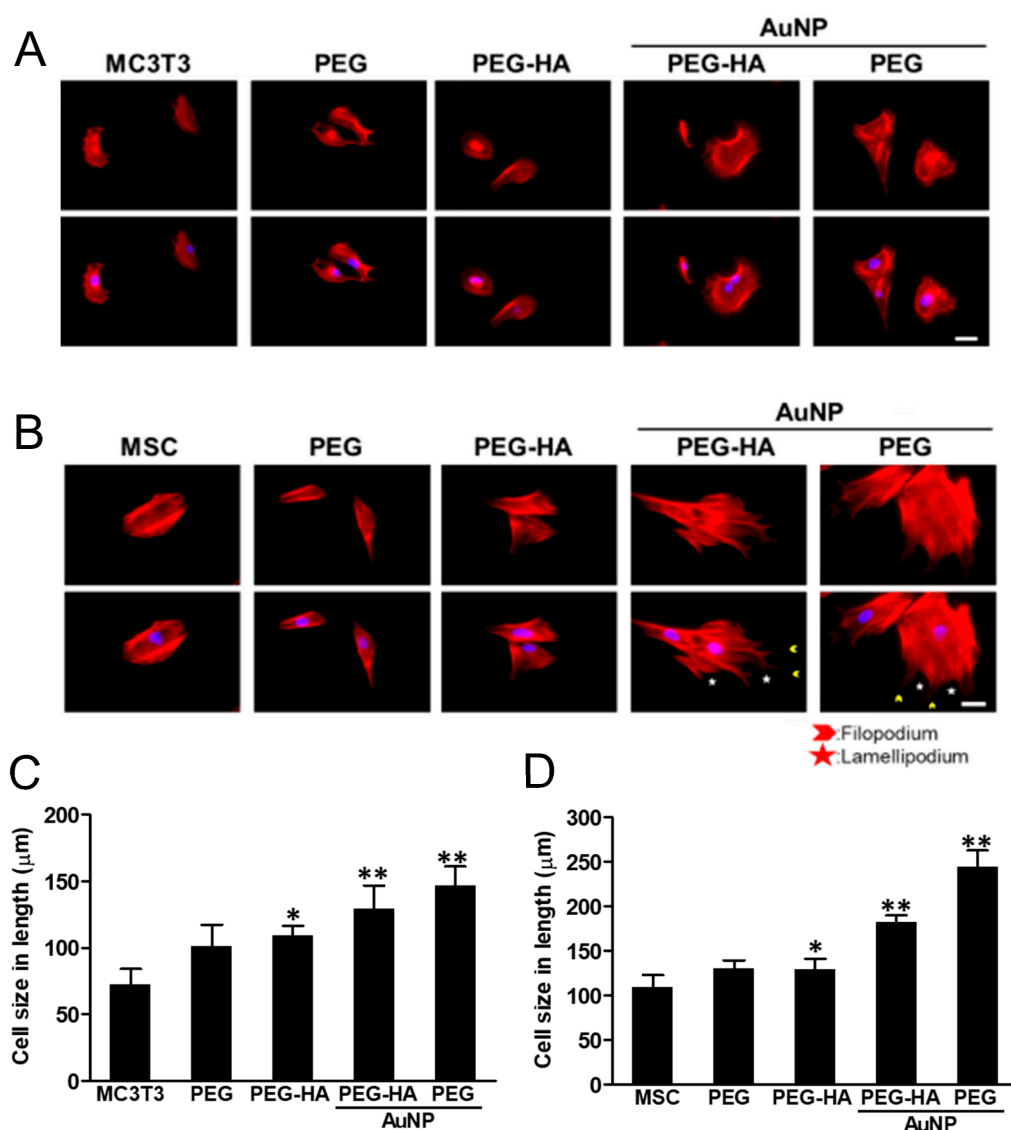

**Figure S2.** Cytoskeleton and cell morphology by rhodamine phalloidin staining of (A) MC3T3 cells and (B) MSCs for actin fiber extension on different materials after 8 h of incubation under fluorescence microscopy analysis. Arrows indicate filopodia (green color) and lamellipodia (red color). The actin fiber extension in length quantified by Image J software in (C) MC3T3 cells and (D) MSCs on different materials after 8 h is shown. Actin fiber length elongation was significantly observed in the PEG-HA-AuNP and PEG-AuNP test groups compared with the other groups. Data are mean  $\pm$  SD (n = 3). \*p < 0.05; \*\*p < 0.05. Scale bar = 50  $\mu$ m. Data are the mean  $\pm$  SD (n = 3).

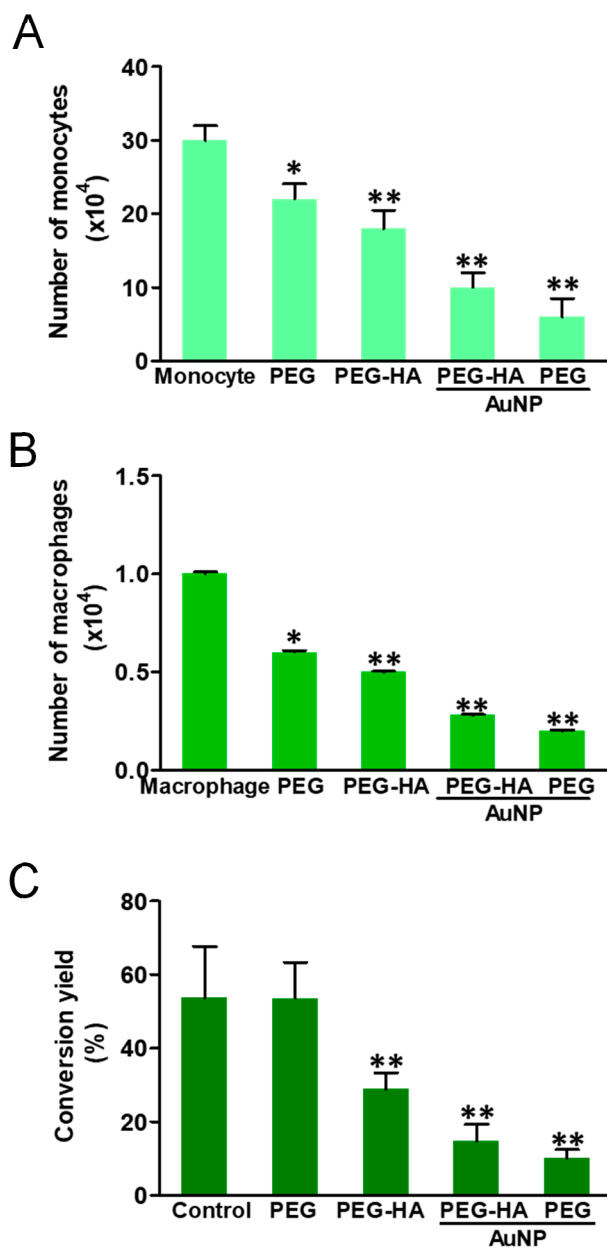

**Figure S3.** Quantification of the activation degree of monocytes and platelets. Number of (A) monocytes and (B) macrophages, and (C) conversion ratio of monocytes to macrophages. Data are the mean ± SD (n = 3). \*p<0.05; \*\*p<0.01: smaller than control (TCPS).

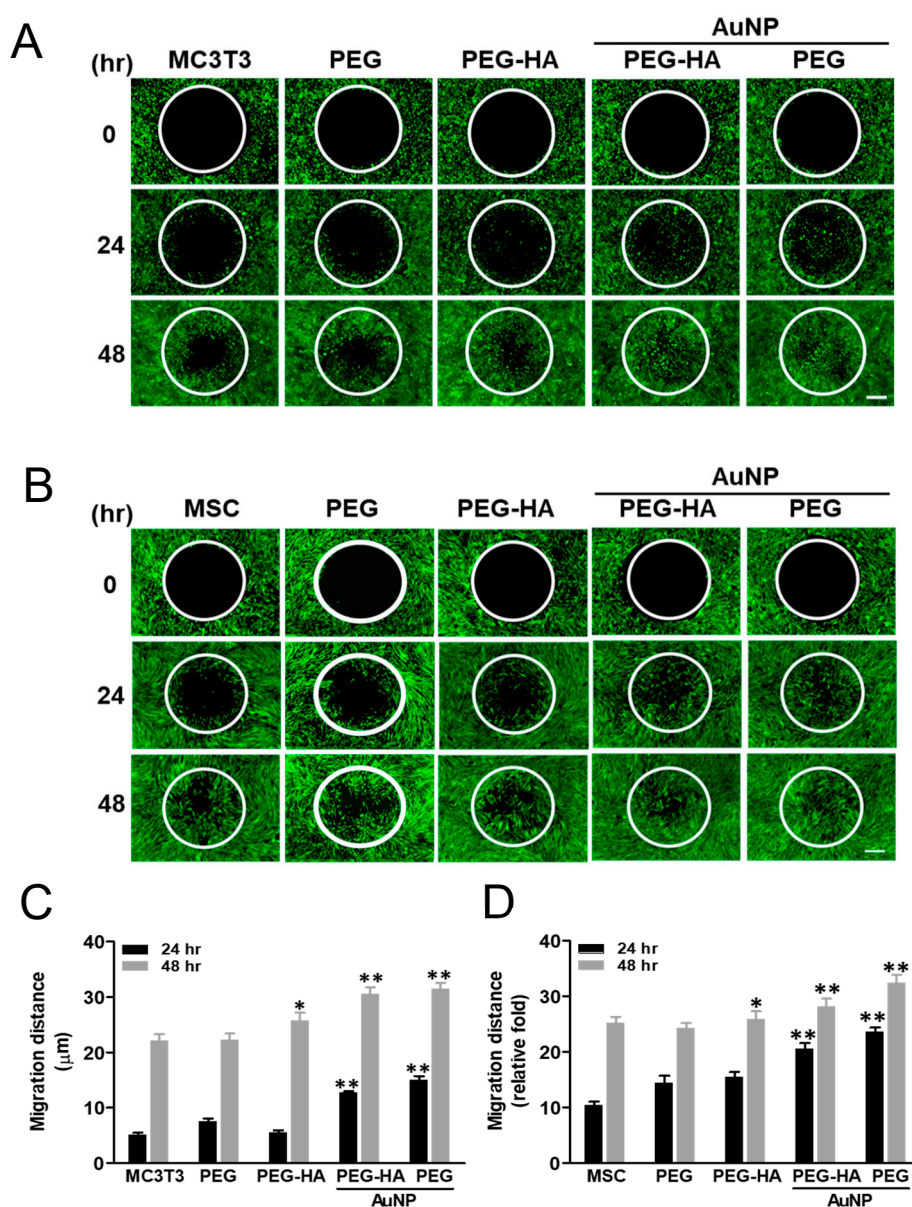

**Figure S4.** Migration of (A) MC3T3 cells and (B) MSCs on different materials during a period of 24 to 48 h. Cell migration into the gap zone area was monitored by fluorescence microscopy. Cells were stained by Calcein AM (2  $\mu$ M) prior to examination. Scale bar = 500  $\mu$ m. Quantification of the fluorescence intensity of (C) MC3T3 cells and (D) MSCs by Image J software. Data are the mean  $\pm$  SD (n = 3). \*p<0.05; \*\*p<0.01; greater than control (TCPS). Data were obtained from three different experiments.

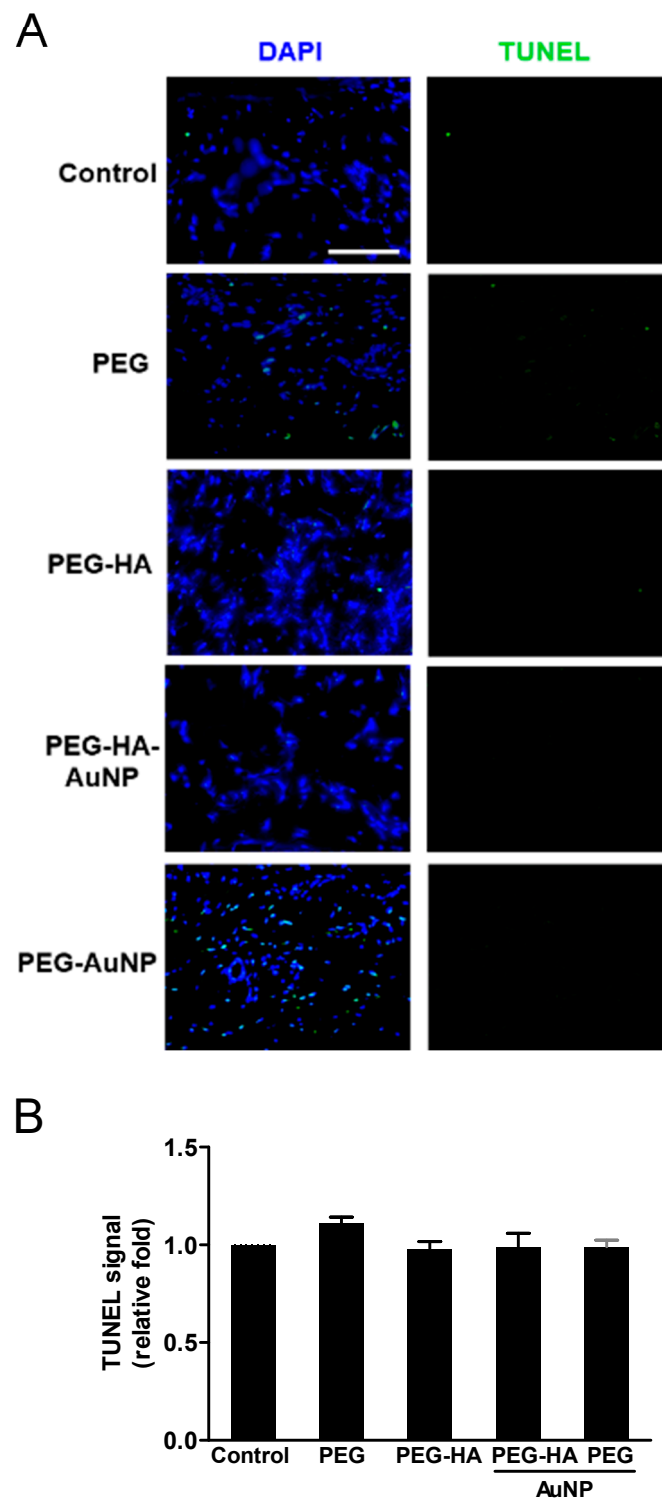

**Figure S5.** (A) Representative images of immunofluorescence staining for TUNEL-positive nuclei in different groups (20 × magnification). (B) Quantification of TUNEL-positive cells shows a lower number in the treated group as compared to the control group. Scale bar = 100  $\mu$ m. The number of rats was 5 (n=5).

**Table S1.** XPS analysis of PEG and PEG composites

| Sample       | Atomic composition (%) |                 |                  |                 |                  |                                  |
|--------------|------------------------|-----------------|------------------|-----------------|------------------|----------------------------------|
|              | O <sub>1s</sub>        | C <sub>1s</sub> | Ca <sub>2p</sub> | P <sub>2p</sub> | Au <sub>4f</sub> | O <sub>1s</sub> /C <sub>1s</sub> |
| HA           | 34.69                  | 58.88           | 6.43             | -               | -                | 0.59                             |
| PEG          | 63.92                  | 36.08           | -                | -               | -                | 1.77                             |
| PEG-AuNPs    | 54.61                  | 45.39           | -                | -               | a                | 1.20                             |
| PEG-HA       | 27.56                  | 69.69           | 2.37             | 0.39            | -                | 0.40                             |
| PEG-HA-AuNPs | 50.13                  | 37.62           | 4.56             | 7.7             | a                | 1.33                             |

<sup>a</sup> Since the AuNP peaks are not well defined, the percentage of Au 4f cannot be calculated.
